# Supplementary material for: TGF‐β‐induced IGFBP‐3 is a key paracrine factor from activated pericytes that promotes colorectal cancer cell migration and invasion
Source: PubMed Central journal article supplement (PMC7530788; doi:10.1002/1878-0261.12779), 2020-09-01

# Supplementary Figure 2

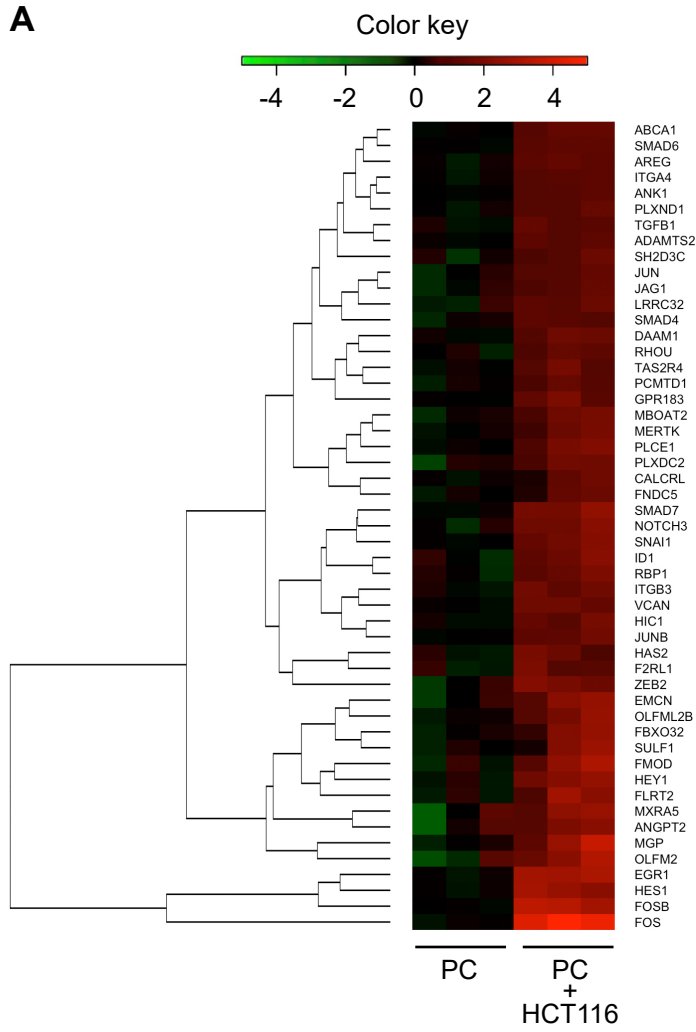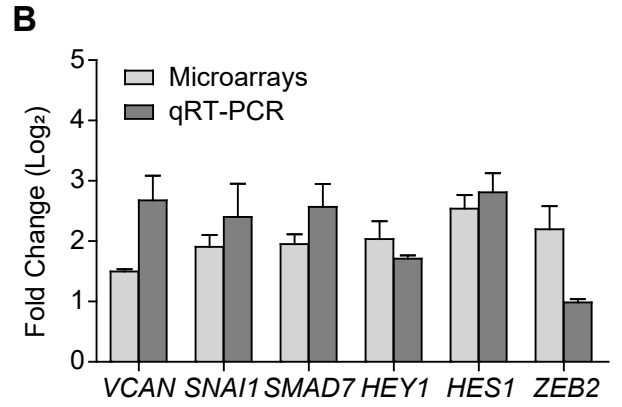

Supplement: MOL2-14-2609-s002.pdf [file MOL2-14-2609-s002.pdf]
